# Supplementary material for: Template synthesis of metal tungsten nanowire bundles with high field electron emission performance
Source: Royal Society of Chemistry journal article supplement (doi:10.1039/c6ra09308f), 2016-01-01
Supplement: c6ra09308f1.pdf [file c6ra09308f1.pdf]

# Supporting Information

## Template Synthesis of Metal Tungsten Nanowire Bundles with High Field Electron Emission Performance

Yong Liu<sup>a†</sup>, Kun Lan<sup>a†</sup>, Mahir H. Es-Saheb<sup>b</sup>, Ahmed A. Elzatahry<sup>c\*</sup>, and Dongyuan Zhao<sup>a\*</sup>

<sup>a</sup> Department of Chemistry, Shanghai Key Laboratory of Molecular Catalysis and Innovative Materials, State Key Laboratory of Molecular Engineering of Polymers, Laboratory of Advanced Materials, *iChEM* (Collaborative Innovation Center of Chemistry for Energy Materials), Fudan University, Shanghai, 200433, China.

<sup>b</sup> Deptmental of Mechanical Engineering, College of Engineering, King Saud University-Mozahmiya Campus, P.O. Box 800, Riyadh 11421, Kingdom of Saudi Arabia.

<sup>c</sup> Materials Science and Technology Program, College of Arts and Sciences, Qatar University, P.O. Box 2713, Doha, Qatar

E-mail: [dyzhao@fudan.edu.cn](mailto:dyzhao@fudan.edu.cn);

[aelzatahry@qu.edu.qa](mailto:aelzatahry@qu.edu.qa)

Homepage: <http://www.mesogroup.fudan.edu.cn/>

<http://www.qu.edu.qa/msp/>

<sup>†</sup> These authors contributed equally to this work.

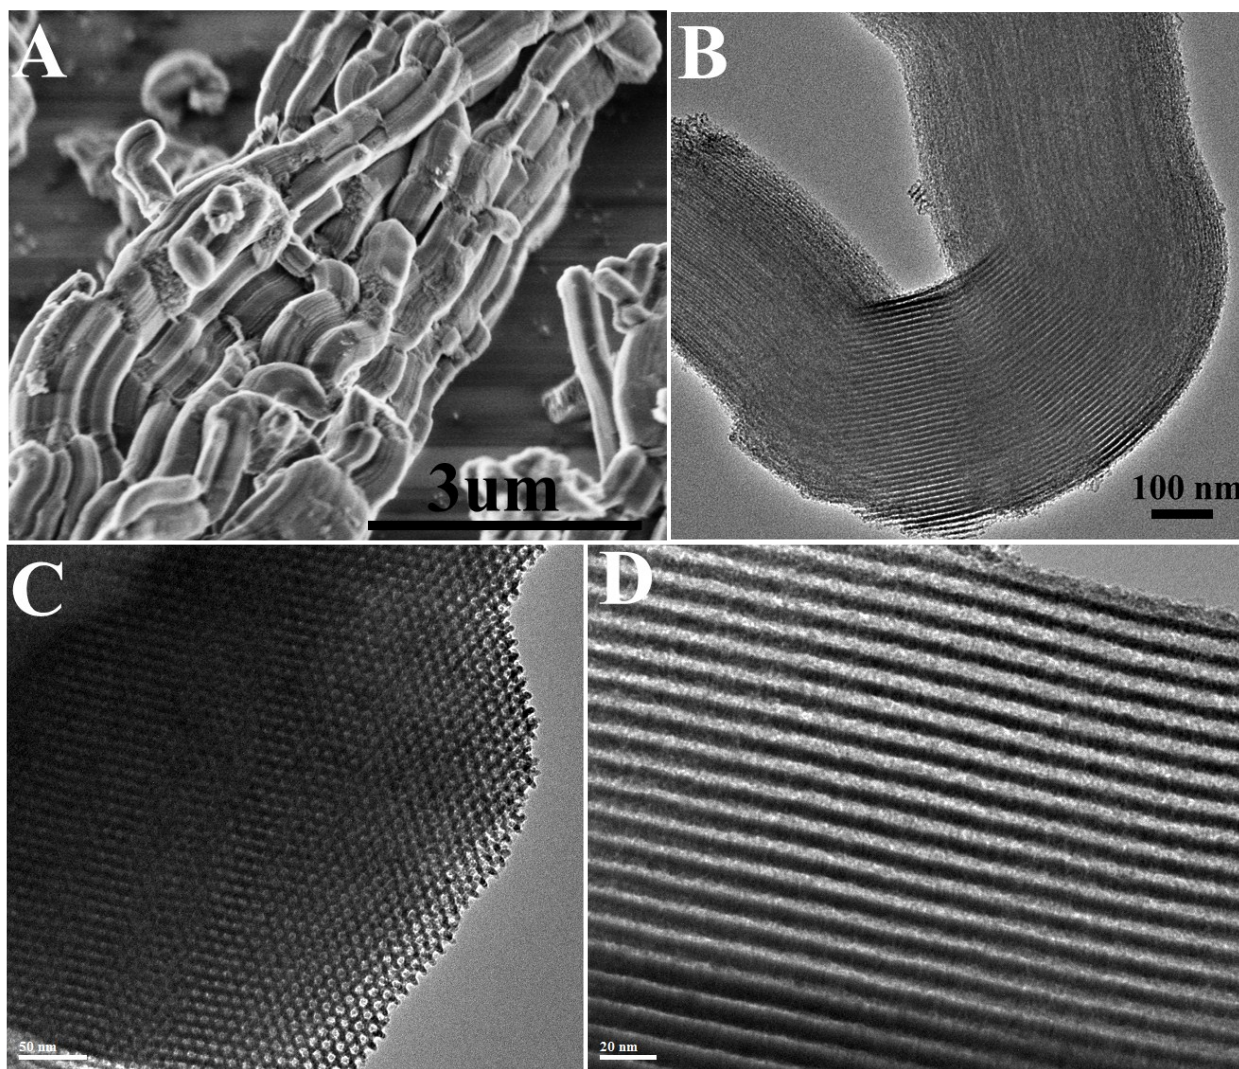

**Figure S1.** The SEM images (A, B) and TEM images (C, D) of the as-prepared mesoporous silica SBA-15 hard template via a hydrothermal treatment at 130°C for 3 days followed by calcination at 550 °C for 5 h.

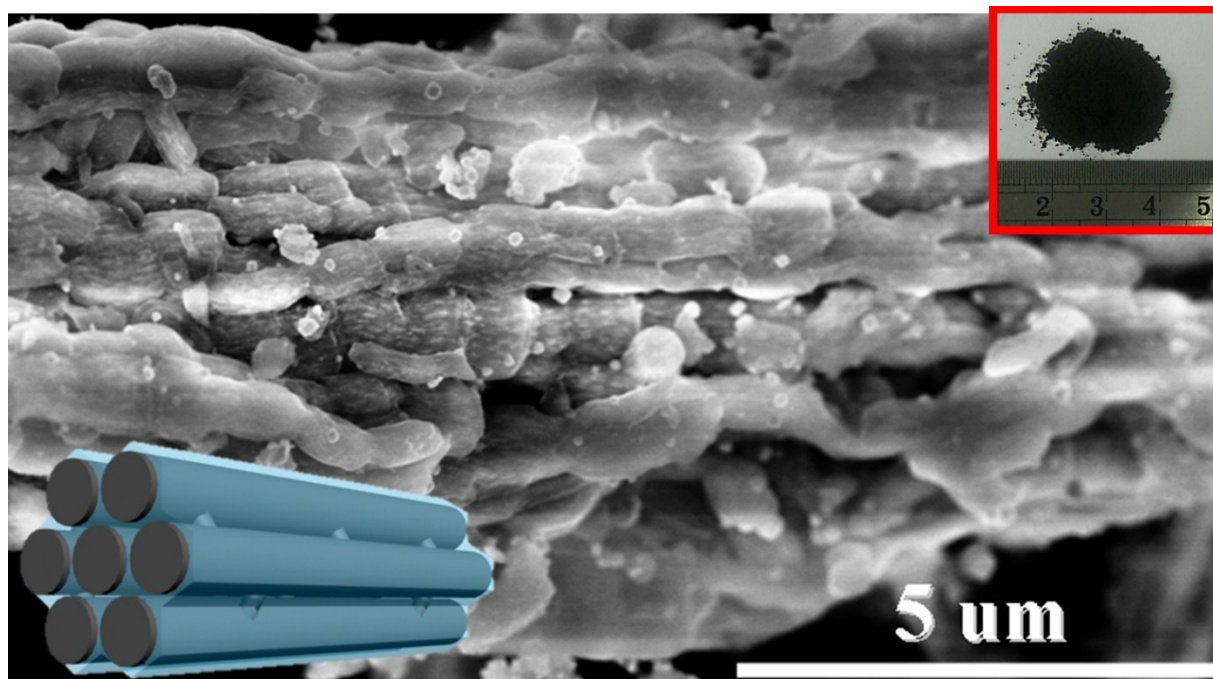

**Figure S2.** The SEM image of the mesoporous composite W@SBA-15 synthesized via the impregnation of PTA into the mesochannels of the SBA-15 template followed by H<sub>2</sub>-reduction at 800 °C for 2 h. Insets are the corresponding structural model (bottom-left corner) and photo picture of the composite W@SBA-15 (top-right corner).

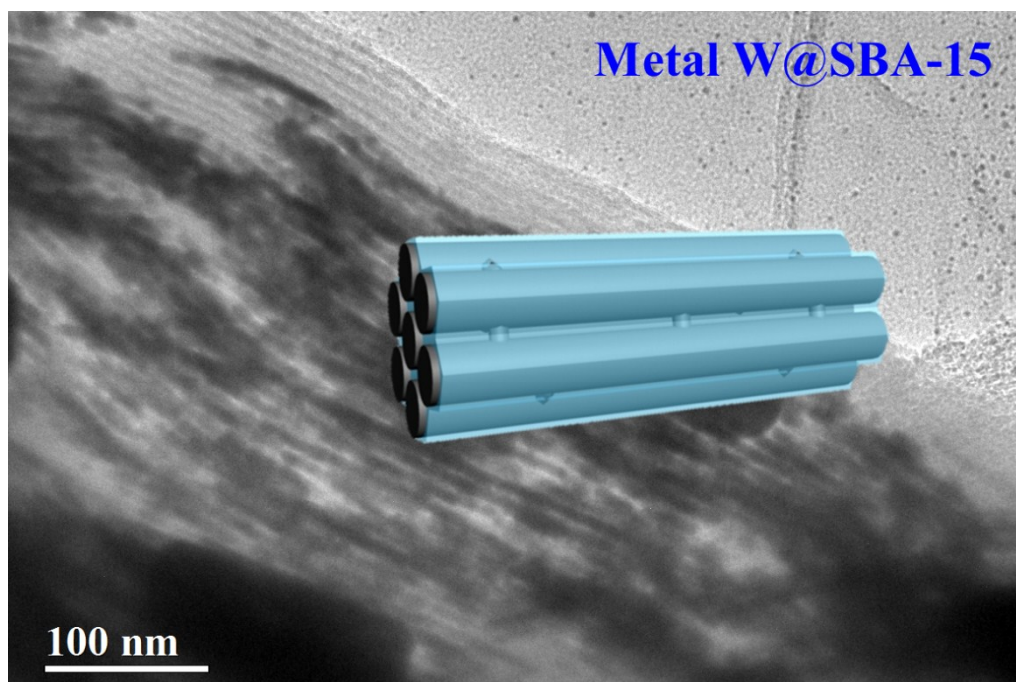

**Figure S3.** The TEM image of the composite W@SBA-15 synthesized via the impregnation of PTA into the mesochannels of the SBA-15 template followed by H<sub>2</sub>-reduction at 800 °C for 2 h. Inset is the corresponding structural model of the composite W@SBA-15.

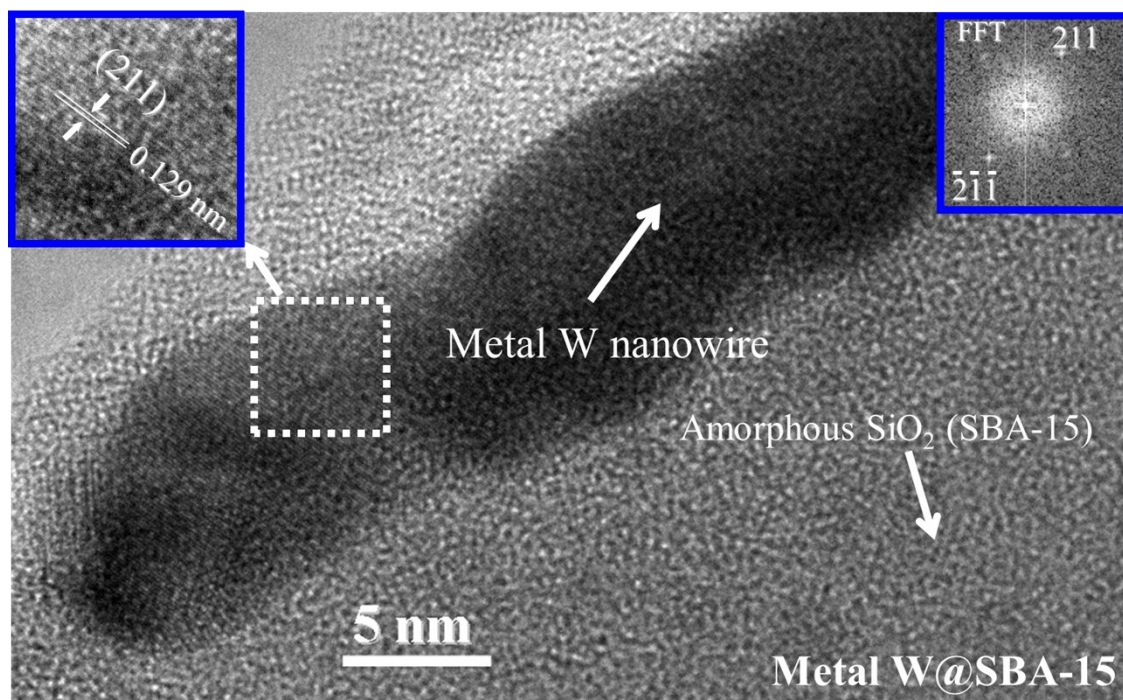

**Figure S4.** The TEM image of the W@SBA-15 via the impregnation of PTA into the mesochannels of the SBA-15 template followed by H<sub>2</sub>-reduction at 800 °C for 2 h. Inset in top-left corner is the HRTEM image recorded in the dotted square area. Inset in top-right corner is the two-dimensional Fourier transform of the HRTEM area remarked in the dotted square area.

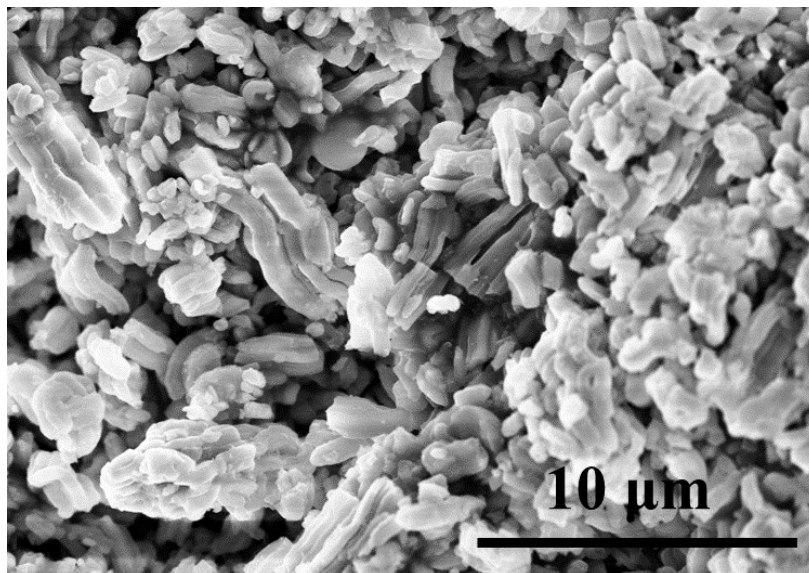

**Figure S5.** The low magnification SEM image of W nanowire bundles prepared via  $\text{H}_2$  gas reduction followed by the removal of SBA-15 template by an HF solution.

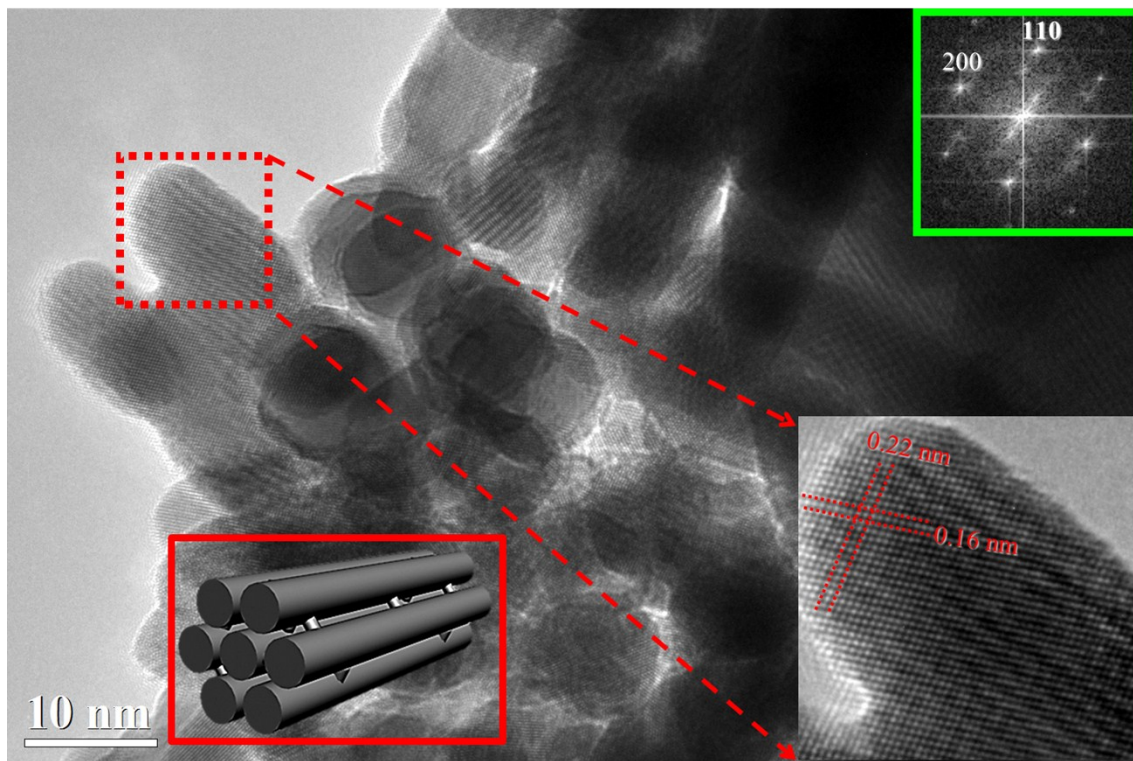

**Figure S6.** The HRTEM image of the metallic W nanowire bundles obtained after the  $\text{H}_2$ -reduction at 800 °C for 2 h followed by the removal of silica SBA-15 in HF solution. The top and bottom right corner insets are the FFT and HRTEM images taken from the dotted square region marked in red, respectively. The bottom-left corner inset is the structural model of the metallic W nanowire bundles.

**Table S1. The field-electron emission performance of various W nanostructures**

| W nanostructures             | Turn-on field ( $V \mu m^{-1}$ ) | Field enhancement factor ( $\beta$ ) |
|------------------------------|----------------------------------|--------------------------------------|
| W nanowires <sup>[1,2]</sup> | 5.0                              | 3825                                 |
| W nanorods <sup>[3]</sup>    | 8.0                              | -                                    |
| W nanothorns <sup>[4]</sup>  | 6.2                              | 1578                                 |
| W nanowires (this work)      | 4.1                              | 3563                                 |

[1] Y.-H. Lee, C.-H. Choi, Y.-T. Jang, E.-K. Kim, B.-K. Ju, N.-K. Min, J.-H. Ahn, *Appl Phys Lett*, 2002, **81**, 745-747. 31.

[2] S. Wang, Y. He, X. Fang, J. Zou, Y. Wang, H. Huang, P.M. Costa, M. Song, B. Huang, C.T. Liu, *Adv. Mater*, 2009, **21**, 2387-2392

[3] J. Zhou, S. Z. Peng, J. Chen, J. C. She, N. S. Xu, Presented at IVMC & IFES 2002, Lyon, France, July 2002, available at [http://ifes2002.univ-lyon1.fr/Abstract/EA\\_147.pdf](http://ifes2002.univ-lyon1.fr/Abstract/EA_147.pdf).

[4] Y. Baek, Y. Song, K. Yong, *Adv. Mater.* 2006, **18**, 3105.
